# Supplementary material for: Simple pyrolysis of cobalt alginate fibres into Co3O4/C nano/microstructures for a high-performance lithium ion battery anode
Source: Royal Society of Chemistry journal article supplement (doi:10.1039/c4ta03052d), 2014-08-29
Supplement: c4ta03052d1.pdf [file c4ta03052d1.pdf]

Electronic Supplementary Information for

**Simple Pyrolysis of Cobalt Alginate Fibres into Co<sub>3</sub>O<sub>4</sub>/C Nano/Microstructures for High-performance Lithium Ion Battery Anode**

Daohao Li <sup>a</sup>, Dongjiang Yang<sup>\*,a,b</sup>, Xiaoyi Zhu <sup>a</sup>, Dengwei Jing <sup>c</sup>, Yanzhi Xia<sup>\*,a</sup>,  
Quan Ji <sup>a</sup>, Rongsheng Cai <sup>a</sup>, Hongliang Li <sup>a</sup> and Yanke Che<sup>\*,d</sup>

<sup>a</sup>Collaborative Innovation Centre for Marine Biomass Fibres, Materials and Textiles of Shandong Province; College of Chemical and Environmental Engineering, Qingdao University, Qingdao, P R China.

<sup>b</sup>Queensland Micro- and Nanotechnology Centre (QMNC), Griffith University, Nathan, Brisbane, Queensland 4111, Australia.

<sup>c</sup>International Research Centre for Renewable Energy, State Key Laboratory of Multiphase Flow in Power Engineering, Xi'an Jiaotong University, Xi'an 710049, China.

<sup>d</sup>Institute of Chemistry, The Chinese Academy of Sciences, Beijing, PR China.

\*To whom correspondence should be addressed. E-mail: [d.yang@qdu.edu.cn](mailto:d.yang@qdu.edu.cn);  
[qdxzyzh@qdu.edu.cn](mailto:qdxzyzh@qdu.edu.cn); [ykche@iccas.ac.cn](mailto:ykche@iccas.ac.cn)

Estimation of the relative volumetric energy density ( $D_{ve}$ )

It is known that the relative volumetric energy density ( $D_{ve}$ ) of the  $\text{Co}_3\text{O}_4\text{-CF}$  electrode can be calculated as follows:

$$D_{ve} = C_v \cdot U$$

$$C_v = \frac{C}{V} = \frac{C_s \cdot M}{\frac{M}{D_t}} = C_s \cdot D_t$$

$C_v$ : volume capacity

$U$ : voltage

$C$ : the capacity of the active material

$V$ : the volume of the active material

$C_s$ : the reversible capacity of active material

$M$ : the mass of the active material

$D_t$ : the tap density

Obviously,  $D_{ve}$  is proportional to volume capacity ( $C_v$ ). So in this work, we estimated the  $D_{ve}$  of  $\text{Co}_3\text{O}_4\text{-CF}$  by using  $C_v$ . Given that the tap density ( $D_t$ ) and the reversible capacity ( $C_s$ ) of the  $\text{Co}_3\text{O}_4\text{-CF}$  is  $1.51 \text{ g cm}^{-3}$  and  $780 \text{ mAh g}^{-1}$ , respectively,  $C_v$  value of the  $\text{Co}_3\text{O}_4\text{-CF}$  is  $1178 \text{ mAh cm}^{-3}$ .

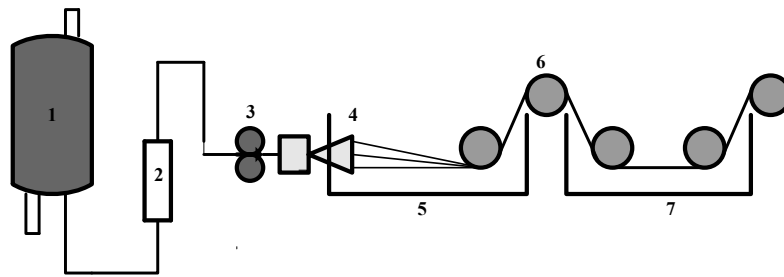

1. Spinning solution tank of 5 wt % alginate sodium 2. Polypropylene filter of 10 μm 3. Metering pump  
4. Spinneret 5. Coagulation bath of CaCl<sub>2</sub> 6. Filament roller 7. Stretch bath 8. Stretch roller

**Fig. S1** Wet spinning process for the preparation of Ca-AF.

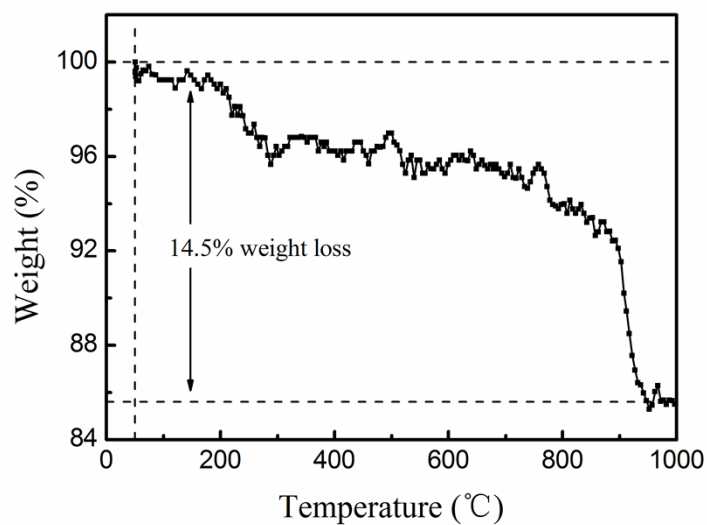

**Fig. S2** The TGA curve of the  $\text{Co}_3\text{O}_4\text{-CF}$  in air.

TGA measurement showed the thermal decomposition of  $\text{Co}_3\text{O}_4\text{-CF}$  with a heating rate of  $10\text{ }^\circ\text{C min}^{-1}$  in air (Fig. S2). The  $\text{Co}_3\text{O}_4\text{-CF}$  began to decompose at  $180\text{ }^\circ\text{C}$  and rapidly decomposed when the temperature was higher than  $870\text{ }^\circ\text{C}$ , and the process of decomposition for the sample was finished when the temperature was arised to  $950\text{ }^\circ\text{C}$ . The whole process of thermal decompositions for the  $\text{Co}_3\text{O}_4\text{-CF}$  is the result of decomposition of carbon, and the residue is  $\text{Co}_3\text{O}_4$ , which determines a mass ratio of 85.5:14.5 ( $\text{Co}_3\text{O}_4$  NPs:carbon) of the two materials in the  $\text{Co}_3\text{O}_4\text{-CF}$ .

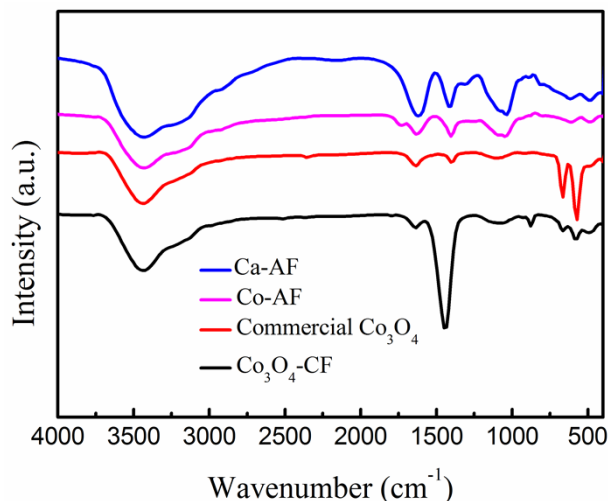

**Fig. S3** The FTIR spectra of the samples.

FTIR spectra of the samples are presented in Fig. S3. For Ca-AF and Co-AF, the absorption bands at 1619 and 1403  $\text{cm}^{-1}$  were due to the respective asymmetric and symmetric stretching vibrations of carboxylate anions, and the absorption peak at 2915  $\text{cm}^{-1}$  can be assigned to the C-H asymmetric stretching vibration. It is illustrated that the two precursors own same functional groups. For commercial  $\text{Co}_3\text{O}_4$  and  $\text{Co}_3\text{O}_4\text{-CF}$ , the absorption bands at 663 and 570  $\text{cm}^{-1}$  were the Co-O stretching vibration of  $\text{Co}_3\text{O}_4$ , which illustrated that the  $\text{Co}_3\text{O}_4$  NPs were existed in carbon fibres. Compared the FTIR spectra of Co-AF and  $\text{Co}_3\text{O}_4\text{-CF}$ , after calcination in  $\text{N}_2$  atmosphere and subsequent oxidation process for Co-AF, the  $\text{Co}^{2+}$  cations convert to  $\text{Co}_3\text{O}_4$  species.

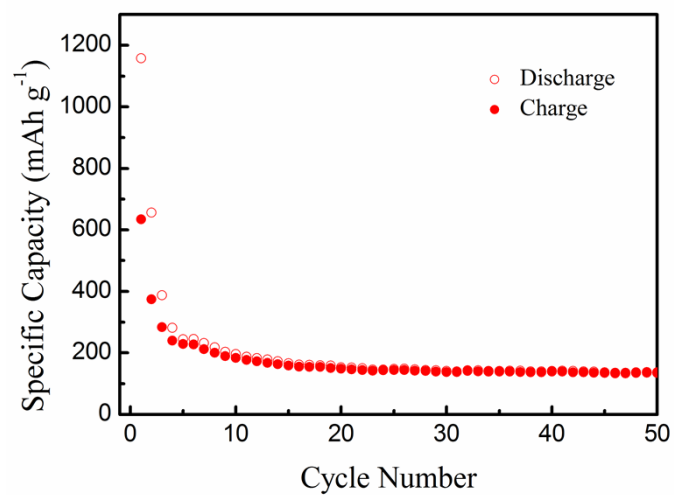

**Fig. S4** The cycling performance of commercial  $\text{Co}_3\text{O}_4$  at  $89 \text{ mAh g}^{-1}$ .
